# Supplementary material for: Upregulation of Activation Induced Cell Markers (AIM) among Severe COVID-19 patients in Bangladesh
Source: bioRxiv or medRxiv preprint supplement (doi:10.1101/2022.07.12.22276726), 2022-07-15
Supplement: Supplementary file [file media-1.pdf]

1 **Supplementary Data:** Bhuiyan et al.

2 **Title:**

3 **Upregulation of Activation Induced Cell Markers (AIM) among Severe COVID-19**  
4 **patients in Bangladesh**

5 Taufiqur Rahman Bhuiyan<sup>1¶</sup>, Hasan Al Banna<sup>1¶</sup>, M Hasanul Kaisar<sup>1</sup>, Polash Chandra  
6 Karmakar<sup>1</sup>, Al Hakim<sup>1,2</sup>, Afroza Akter<sup>1</sup>, Tasnuva Ahmed<sup>1</sup>, Imam Tauheed<sup>1</sup>, Shaumik Islam<sup>1</sup>,  
7 Mohammad Abul Hasnat<sup>3</sup>, Mostafa Aziz Sumon<sup>3</sup>, Asif Rashed<sup>4</sup>, Shuvro Ghosh<sup>4</sup>, John D  
8 Clemens<sup>1,5,6</sup>, Sayera Banu<sup>1</sup>, Tahmina Shirin<sup>7</sup>, Daniela Weiskopf<sup>8</sup>, Alessandro Sette<sup>8,9</sup>, Fahima  
9 Chowdhury<sup>1#</sup>, Firdausi Qadri<sup>1.#,\*</sup>

10 <sup>1</sup>International Centre for Diarrhoeal Disease Research Bangladesh (icddr,b), Dhaka,  
11 Bangladesh

12 <sup>2</sup>Department of Genetic Engineering and Biotechnology, Faculty of Life and Earth Sciences,  
13 Jagannath University, Dhaka, Bangladesh

14 <sup>3</sup>Kurmitola General Hospital, Dhaka, Bangladesh

15 <sup>4</sup>Mugda Medical College & Hospital, Dhaka, Bangladesh

16 <sup>5</sup>UCLA Fielding School of Public Health, Los Angeles, CA, USA

17 <sup>6</sup>International Vaccine Institute, Seoul, South Korea

18 <sup>7</sup>Institute of Epidemiology, Disease Control and Research, Dhaka, Bangladesh

19 <sup>8</sup>Center for Infectious Disease and Vaccine Research, La Jolla Institute for Immunology  
20 (LJI), La Jolla, CA 92037, USA

21 <sup>9</sup>Department of Medicine, Division of Infectious Diseases and Global Public Health,  
22 University of California, San Diego (UCSD), La Jolla, CA 92037, USA

23

24 **Running title:** AIM assay in COVID-19 patients

25 <sup>¶</sup>Co-first author; <sup>#</sup>Senior author; <sup>\*</sup>Corresponding author

26 \*Dr. Firdausi Qadri, PhD  
27 Senior Scientist and Head, Mucosal Immunology and Vaccinology Unit,  
28 Infectious Diseases Division  
29 International Centre for Diarrhoeal Disease Research, Bangladesh (icddr,b),  
30 68, Shaheed Tajuddin Ahmed Sarani, Mohakhali, Dhaka 1212, Bangladesh.  
31 Tel: +880 (0)2-2222-77001-10, Ext 2431; Email: [fqadri@icddr.org](mailto:fqadri@icddr.org)

32 **Supplementary Table 01: Demographic information for the participants of AIM assay**

| Variables        |               | COVID-19 patients<br>(n=42) |               |                   |                  |                   | Healthy Control<br>(n=9) | Unexposed (Pre-pandemic)<br>(n=10) |
|------------------|---------------|-----------------------------|---------------|-------------------|------------------|-------------------|--------------------------|------------------------------------|
|                  |               | Asymptomatic<br>(n=5)       | Mild<br>(n=6) | Moderate<br>(n=6) | Severe<br>(n=15) | Expired<br>(n=10) |                          |                                    |
| Mean Age (Years) | 44.7 (n=61)   | 45                          | 41.3          | 48.5              | 45.3             | 58.7              | 41.78                    | 31.9                               |
| Sex              | Male (n=34)   | 1                           | 2             | 3                 | 12               | 6                 | 5                        | 5                                  |
|                  | Female (n=27) | 4                           | 4             | 3                 | 3                | 4                 | 4                        | 5                                  |
| Blood Group      | O+ (n=20)     | 1                           | 2             | 2                 | 5                | 2                 | 5                        | 3                                  |
|                  | A+ (n=13)     | 2                           | 2             | 0                 | 4                | 3                 | 0                        | 2                                  |
|                  | B+ (n=21)     | 2                           | 2             | 2                 | 5                | 4                 | 3                        | 3                                  |
|                  | AB+ (n=6)     | 0                           | 0             | 2                 | 1                | 1                 | 0                        | 2                                  |
|                  | O- (n=1)      | 0                           | 0             | 0                 | 0                | 0                 | 1                        | 0                                  |

33

34

35 **Supplementary Table 02: Antibody Panel for T cell phenotyping**

| SL* | Marker    | Fluorochrome      | Clone | Company        | Catalog#   | Dilution           |
|-----|-----------|-------------------|-------|----------------|------------|--------------------|
| 1   | Live/Dead | (Fixable Near-IR) | -     | Thermo Fisher  | L10119     | 1:1000<br>[Step 1] |
| 2   | CD3       | Amcyan            | SK7   | BD Biosciences | 339186     | 1:100              |
| 3   | CD19      | FITC              | HIB19 | BD Biosciences | 555412     | 3:100              |
| 4   | CD4       | PerCP             | SK3   | BD Biosciences | 347324     | 3:100              |
| 5   | CD8       | PECy7             | SK1   | BD Biosciences | 335787     | 1:100              |
| 6   | CXCR5     | BV421             | RF8B2 | BD Biosciences | 562747     | 2:100              |
| 7   | CD45RO    | PE                | UCHL1 | BD Biosciences | 555493     | 3:100              |
| 8   | CD27      | APC               | O323  | Thermo Fisher  | 17-0279-42 | 2:100              |

36

37 \*SL = Serial Number

38

39 **Supplementary Table 03: Antibody Panel for MAIT cell phenotyping**

| SL* | Marker             | Fluorochrome      | Clone | Company        | Catalog# | Dilution           |
|-----|--------------------|-------------------|-------|----------------|----------|--------------------|
| 1   | Live/Dead          | (Fixable Near-IR) | -     | Thermo Fisher  | L10119   | 1:1000<br>[Step 1] |
| 2   | CD3                | Amcyan            | SK7   | BD Biosciences | 339186   | 1:100              |
| 3   | CD4                | PerCP             | SK3   | BD Biosciences | 347324   | 3:100              |
| 4   | CD8                | PECy7             | SK1   | BD Biosciences | 335787   | 1:100              |
| 5   | TCR V $\alpha$ 7.2 | PE                | 3C10  | Biolegend      | 351706   | 2:100              |
| 6   | CD161              | APC               | DX12  | BD Biosciences | 550968   | 2:100              |
| 7   | CD69               | PE-Cy5            | FN50  | BD Biosciences | 555532   | 2:100              |

40

41 \*SL = Serial Number

42

43 **Supplementary Table 04: Antibody Panel for NK cell phenotyping**

| SL* | Marker    | Fluorochrome      | Clone  | Company        | Catalog# | Dilution           |
|-----|-----------|-------------------|--------|----------------|----------|--------------------|
| 1   | Live/Dead | (Fixable Near-IR) | -      | Thermo Fisher  | L10119   | 1:1000<br>[Step 1] |
| 2   | CD3       | PB                | SP34-2 | BD Biosciences | 558124   | 1:100              |
| 3   | CD19      | APC Cy7           | SJ25C1 | BD Biosciences | 557791   | 1:100              |
| 4   | CD14      | APC Cy7           | MφP9   | BD Biosciences | 557831   | 1:100              |
| 5   | CD16      | FITC              | 3G8    | BD Biosciences | 555406   | 2:100              |
| 6   | CD56      | PerCP Cy5.5       | B159   | BD Biosciences | 560842   | 2:100              |

44

45 \*SL = Serial Number

46

47 **Supplementary Table 05: Antibody Panel for AIM assay**

| SL* | Marker            | Fluorochrome      | Clone         | Company        | Catalog#   | Dilution           |
|-----|-------------------|-------------------|---------------|----------------|------------|--------------------|
| 1   | Live/Dead         | (Fixable Near-IR) | -             | Thermo Fisher  | L10119     | 1:1000<br>[Step 1] |
| 2   | CD14              | BV785             | M5E2          | Biolegend      | 301840     | 1:100              |
| 3   | CD16              | BV785             | 3G8           | Biolegend      | 302046     | 1:100              |
| 4   | CXCR5<br>(CD185)  | BV605             | J252D4        | Biolegend      | 356930     | 1:100              |
| 5   | PD1<br>(CD279)    | EF450 (PB)        | MIH4          | ThermoFisher   | 48-9969-42 | 2:100              |
| 6   | CD40L (C<br>D154) | BV711             | 24-31         | Biolegend      | 310838     | 2:100              |
| 7   | CD8               | PE-Cy7            | SK1           | BD Biosciences | 335787     | 1:100              |
| 8   | CD69              | PE-Cy5.5          | CH/4          | ThermoFisher   | MHCD6918   | 2:100              |
| 9   | CD4               | Amcyan            | SK3           | BD Biosciences | 339187     | 3:100              |
| 10  | CD137             | PE                | 4B4-1         | Biolegend      | 309804     | 1:100              |
| 11  | CD19              | FITC              | HIB19         | BD Biosciences | 555412     | 1:100              |
| 12  | OX40<br>(CD134)   | APC               | Ber-<br>ACT35 | Biolegend      | 350008     | 1:100              |

48

49 \*SL = Serial Number
